# Supplementary material for: Fabrication of SrTiO3–TiO2 heterojunction photoanode with enlarged pore diameter for dye-sensitized solar cells
Source: Royal Society of Chemistry journal article supplement (doi:10.1039/c3ta12604h), 2013-01-01
Supplement: c3ta12604h.pdf [file c3ta12604h.pdf]

## Supporting Information

# Fabrication of SrTiO<sub>3</sub>-TiO<sub>2</sub> Heterojunction Photoanode with Enlarged Pore Diameter for Dye-Sensitized Solar Cells

Chang Woo Kim<sup>‡a</sup>, Sang Pil Suh<sup>‡a</sup>, Mi Jin Choi<sup>b</sup>, Yong Soo Kang<sup>b</sup> and Young Soo Kang<sup>\*a</sup>

<sup>a</sup> Korea Center for Artificial Photosynthesis, Department of Chemistry, Sogang University, Seoul 121-741, Korea

<sup>b</sup> Korea Center for Next Generation Dye-Sensitized Solar Cells and WCU, Department of Energy Engineering, Hanyang University, Seoul 133-791, Korea

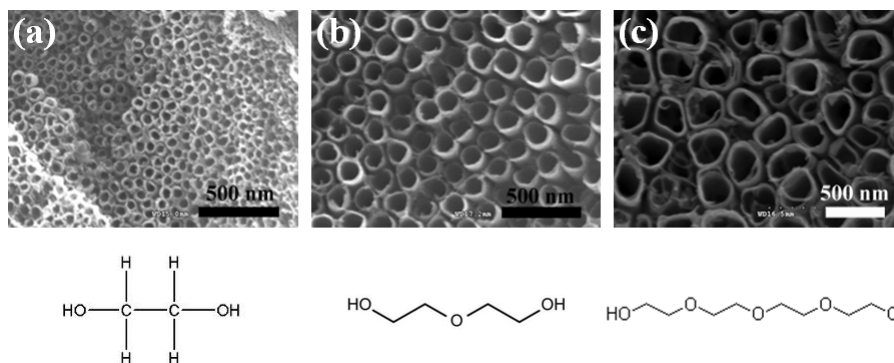

Figure S1. Comparison of TiO<sub>2</sub> tube morphology using electrolyte with various dielectric constant. (a) ethylene glycol (dielectric constant, 37 at 25 °C), (b) diethylene glycol (dielectric constant, 31.69 at 25 °C) and (c) tetraethylene glycol (dielectric constant, 15 at 25 °C) produce 50 nm, 100 nm and 200 nm as a pore diameter.

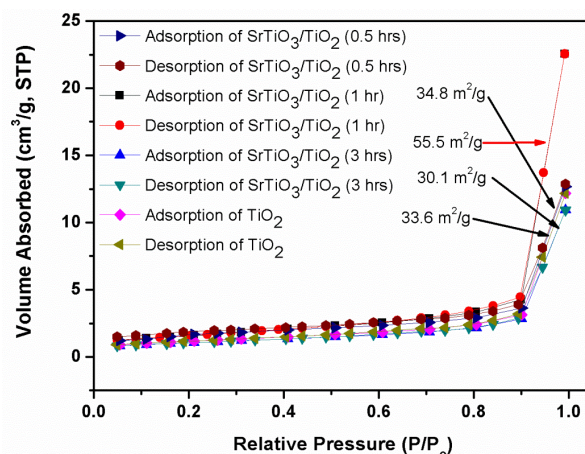

Figure S2. Nitrogen adsorption-desorption isotherm curves of SrTiO<sub>3</sub>-TiO<sub>2</sub> heterostructure nanotube depending on reaction time.

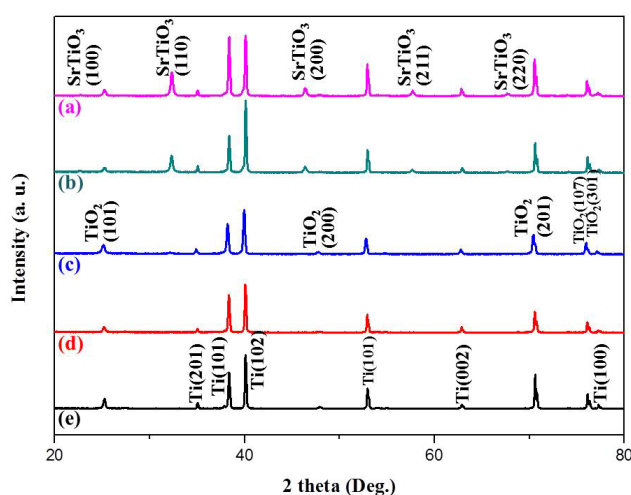

Figure S3. X-ray diffraction patterns of the TiO<sub>2</sub> and SrTiO<sub>3</sub>-TiO<sub>2</sub> nanotube with various hydrothermal reaction times. before hydrothermal (a), 0.5 hr (b), 1 hr (c), 3 hrs (d) and 5 hrs (e).

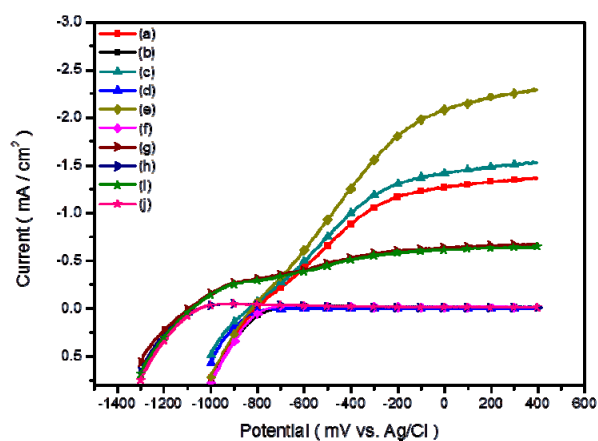

Figure S4. Photocurrent - voltage curves of the  $\text{TiO}_2$  (a) and  $\text{SrTiO}_3\text{-TiO}_2$  nanotube for 0.5 hr (c), 1 hr (e), 3 hrs (g), 5 hrs (i) and their dark current (b), (d), (f), (h), (j), respectively.
